# Supplementary material for: Experimental Study on Properties of Syngas, Tar, and Biochar Derived from Different Gasification Methods
Source: MDPI journal article supplement (doi:10.3390/app132011490), 2023-10-20
Supplement: s1 [file s1]

# **Experimental study on properties of syngas, tar, and biochar derived from different gasification methods**

Yang Yue<sup>1</sup>, Xiaoling Jin<sup>1</sup>, and Lei Deng<sup>1\*</sup>

*<sup>1</sup>State Key Laboratory of Multiphase Flow in Power Engineering, School of Energy and Power  
Engineering, Xi'an Jiaotong University, Xi'an 710049, China*

---

\* To whom correspondence should be addressed. Tel: +86-29-82668703; Fax: +86-29-82668703.

E-mail: leideng@mail.xjtu.edu.cn (L. DENG).

## 1. Results and discussion

### 1.1 Analysis of liquid-phase products

Common compounds of tar are further identified via GC-MS. Tables SM-1 and SM-2 present the names and relative contents of detailed tar components at various temperatures.

**Table S1**

GC-MS results of oak tar derived from MG and EG.

| Compound name              | Relative content (%) at different gasification heating temperatures (°C) |       |        |      |        |      |        |      |         |      |
|----------------------------|--------------------------------------------------------------------------|-------|--------|------|--------|------|--------|------|---------|------|
|                            | 600 °C                                                                   |       | 700 °C |      | 800 °C |      | 900 °C |      | 1000 °C |      |
|                            | MH                                                                       | EH    | MH     | EH   | MH     | EH   | MH     | EH   | MH      | EH   |
| Ethylbenzene               | 2.24                                                                     | 3.03  | 2.53   | 2.55 | -      | 1.21 | -      | 1.33 | 1.72    | -    |
| 1-Cyclohexene, 1-ethynyl-  | 3.46                                                                     | 8.43  | 3.74   | 3.24 | 2.46   | 1.34 | -      | 2.64 | 1.5     | 1.20 |
| Phenylethyne               | -                                                                        | 2.25  | 1.22   | 2.15 | -      | 3.7  | 0.85   | 1.79 | -       | -    |
| Styrene                    | 3.87                                                                     | 10.59 | 5.15   | 7.1  | 4.75   | 9.25 | -      | 9.34 | 3.22    | 8.16 |
| Benzene                    | -                                                                        | 2.09  | -      | 1.02 | 1.46   | 3.24 | 2.46   | 1.11 | -       | 2.85 |
| Naphthalene-2-carbonitrile | -                                                                        | 3.43  | -      | 3.66 | -      | 4.95 | -      | 4.42 | -       | 2.55 |
| 3-Methylphenylacetylene    | 5.84                                                                     | 1.72  | 8.35   | 2.15 | 7.67   | 0.92 | 2.01   | 0.31 | 5.86    | -    |
| Benzocycloheptatriene      | -                                                                        | 0.61  | 0.85   | 0.95 | 3.24   | 1.31 | -      | 1.19 | -       | 0.24 |
| Biphenyl                   | -                                                                        | 2.15  | 1.65   | 3.70 | 1.96   | -    | -      | 3.86 | -       | -    |
| Biphenylene                | 2.35                                                                     | 6.31  | -      | 4.25 | 1.28   | 2.89 | 2.08   | -    | 2.14    | 1.62 |
| Phenanthrene               | 1.44                                                                     | 1.92  | 1.83   | 1.86 | -      | 2.77 | -      | 2.82 | 1.25    | -    |
| Hematoporphyrin            | 2.02                                                                     | 1.02  | -      | 3.24 | 1.52   | 1.11 | -      | 4.07 | -       | 1.28 |
| Tricarbonyl                | -                                                                        | -     | -      | 4.07 | -      | -    | 2.32   | 4.66 | -       | -    |
| Oxirane, ethenyl-          | -                                                                        | 5.52  | -      | 8.69 | -      | -    | -      | 1.36 | -       | -    |
| Rhodopin                   | -                                                                        | 5.19  | -      | 1.38 | 1.67   | 3.76 | 1.92   | 5.44 | -       | 3.20 |
| 2-Pentanone                | 3.06                                                                     | 4.14  | -      | 2.56 | 4.97   | -    | 7.15   | 1.48 | -       | 1.50 |
| Toluene                    | 1.39                                                                     | -     | 1.05   | -    | 2.01-  | 1.47 | -      | 1.79 | 5.21    | 1.08 |
| 1,2,4,5-Tetrazine          | -                                                                        | -     | -      | -    | 2.88   | 5.16 | 2.59   | 3.2  | 1.80    | 1.62 |
| Benzofuran, 2,3-dihydro-   | 1.83                                                                     | 1.49  | -      | 0.38 | 0.89   | 0.89 | -      | -    | 0.58    | -    |
| 1H-Tetrazole, 1-methyl     | 3.17                                                                     | -     | -      | -    | 2.11   | 4.07 | -      | -    | 1.68    | -    |
| Phenol, 2-methoxy-         | -                                                                        | -     | 2.59   | 1.44 | -      | -    | 3.56   | 1.56 | 8.11    | 2.08 |
| methoxy-                   | 0.58                                                                     | 3.89  | -      | 0.85 | -      | -    | 0.25   | 1.09 | 4.66    | -    |

**Table S2**

GC-MS results of corn stalk tar derived from MG and EG.

| Compound name                            | Relative content (%) at different gasification heating temperatures (°C) |      |          |      |          |      |          |      |           |      |
|------------------------------------------|--------------------------------------------------------------------------|------|----------|------|----------|------|----------|------|-----------|------|
|                                          | 600 (°C)                                                                 |      | 700 (°C) |      | 800 (°C) |      | 900 (°C) |      | 1000 (°C) |      |
|                                          | MH                                                                       | EH   | MH       | EH   | MH       | EH   | MH       | EH   | MH        | EH   |
| Ethylbenzene                             | 1.46                                                                     | 1.02 | -        | -    | 4.66     | 0.85 | -        | 0.26 | -         | -    |
| 1-Cyclohexene, 1-ethynyl-                | 1.65                                                                     | 2.32 | 4.05     | 2.50 | -        | -    | -        | -    | 2.74      | 3.52 |
| Phenylethyne                             | -                                                                        | -    | 0.85     | 1.25 | -        | 1.82 | 3.73     | 3.73 | -         | -    |
| Benzene                                  | -                                                                        | 3.46 | -        | 5.44 | -        | -    | -        | 3.52 | -         | 2.58 |
| 3-Methylphenylacetylene                  | 3.87                                                                     | -    | 4.79     | -    | 14.2     | -    | 4.01     | -    | 8.68      | -    |
| Naphthalene                              | -                                                                        | -    | 5.2      | -    | 3.2      | -    | 5.58     | -    | 2.62      | -    |
| Benzocycloheptatriene                    | -                                                                        | 3.2  | 3.2      | 3.2  | 1.36     | 1.36 | -        | -    | -         | -    |
| Biphenyl                                 | 1.73                                                                     | -    | 1.36     | -    | 1.68     | 1.58 | 2.52     | 2.01 | -         | 2.58 |
| Biphenylene                              | -                                                                        | -    | 1.68     | -    | 8.11     | 2.11 | 4.34     | 4.34 | 5.23      | 5.23 |
| Phenanthrene                             | -                                                                        | -    | 4.21     | -    | 4.36     | 1.85 | -        | -    | 2.50      | -    |
| Hematoporphyrin                          | 0.52                                                                     | 3.03 | -        | 3.03 | 0.25     | 2.55 | -        | 1.21 | 2.33      | 1.33 |
| Tricarbonyl                              | 4.62                                                                     | 1.25 | 2.58     | 1.25 | 4.52     | -    | -        | 2.58 | 0.48      | 1.52 |
| 3'H-Cycloprop (1,2)-5-cholest-1-en-3-one | 1.44                                                                     | 1.44 | 8.43     | 8.43 | 3.24     | 3.24 | 1.34     | 1.34 | 2.64      | 2.64 |
| Hexadecanamide                           | 2.02                                                                     | 2.02 | 2.25     | 2.25 | 2.15     | 2.15 | 3.7      | 3.7  | 1.79      | 1.79 |
| Rhodopin                                 | -                                                                        | -    | 2.36     | -    | 3.58     | -    | 9.25     | -    | 9.34      | -    |
| 2-Pentanone                              | 5.19                                                                     | 5.19 | -        | -    | 1.92     | 1.92 | 1.86     | 1.86 | 1.98      | 1.98 |
| Toluene                                  | 4.21                                                                     | 4.21 | 2.09     | 2.09 | 1.02     | 1.02 | 3.24     | 3.24 | 1.11      | 1.32 |
| Furfural                                 | -                                                                        | -    | 3.43     | 3.43 | 3.66     | 3.66 | 4.95     | 4.95 | 4.42      | 4.42 |
| 1,2,4,5-Tetrazine                        | 3.17                                                                     | 3.17 | 1.72     | 1.72 | 2.10     | 2.15 | 0.9      | 1.20 | 0.32      | 2.38 |
| methoxy                                  | -                                                                        | -    | -        | 4.25 | -        | 3.25 | -        | 1.22 | -         | 1.04 |
| Methoxystyrene                           | 1.01                                                                     | -    | -        | 1.85 | 0.54     | 0.54 | 2.40     | -    | -         | 1.66 |
| Phenol, 2-methyl-                        | 5.01                                                                     | 1.58 | 0.38     | 2.28 | -        | -    | -        | 2.66 | 3.62      | -    |
| Benzofuran, 2,3-dihydro-                 | -                                                                        | 1.52 | 1.56     | -    | -        | 3.52 | -        | 4.55 | 1.78      | 2.31 |
| 2,2'-Bifuran                             | 4.25                                                                     | -    | 3.62     | -    | -        | -    | 2.95     | -    | 2.83      | -    |
